# Supplementary material
Source: PubMed Central journal article supplement (PMC4576044)
Supplement: AAC.00486-15_zac010154412so1.pdf [file AAC.00486-15_zac010154412so1.pdf]

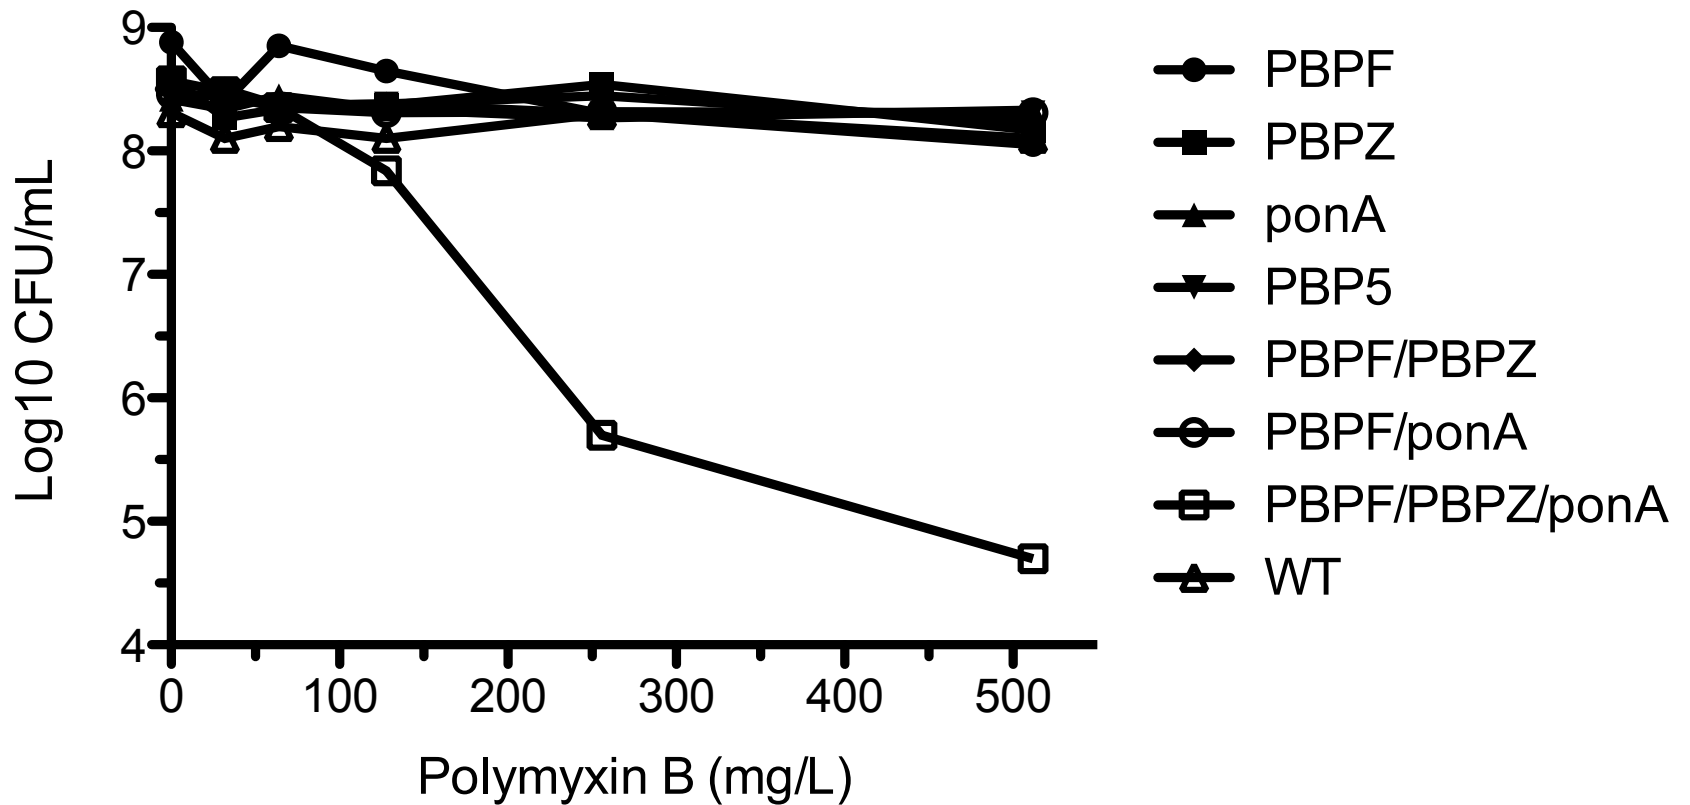

**Figure S1. Polymyxin B population analysis in BHI agar of wild-type (WT) *E. faecium* compared to various PBP knockout mutants as shown in the legend.**

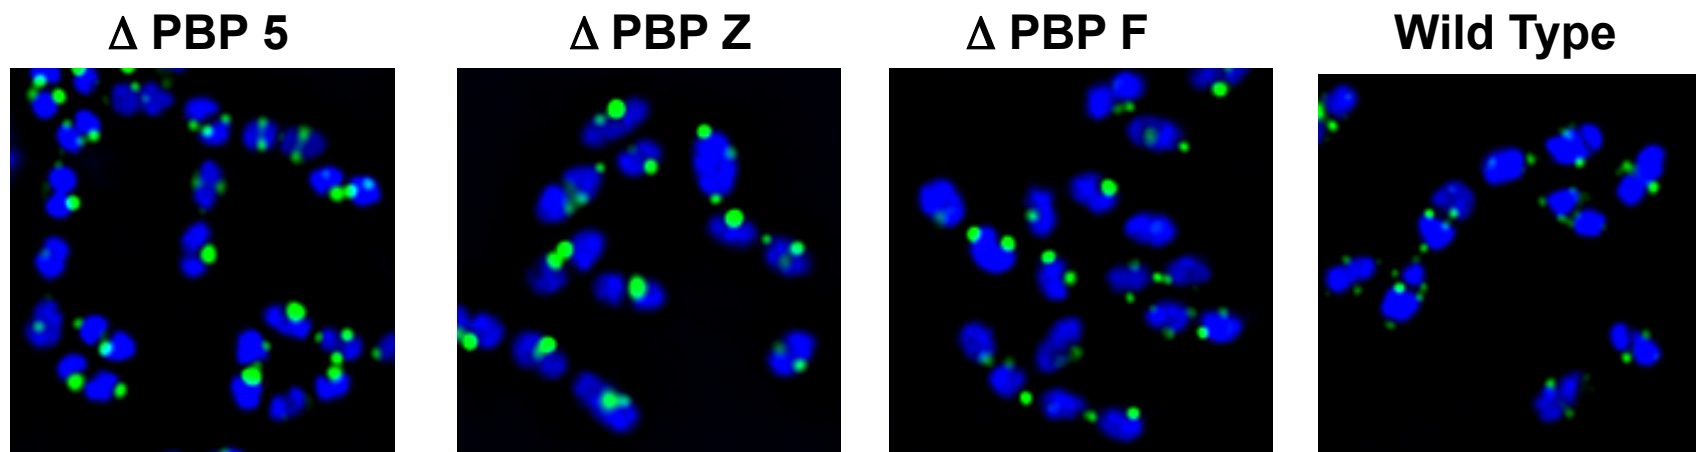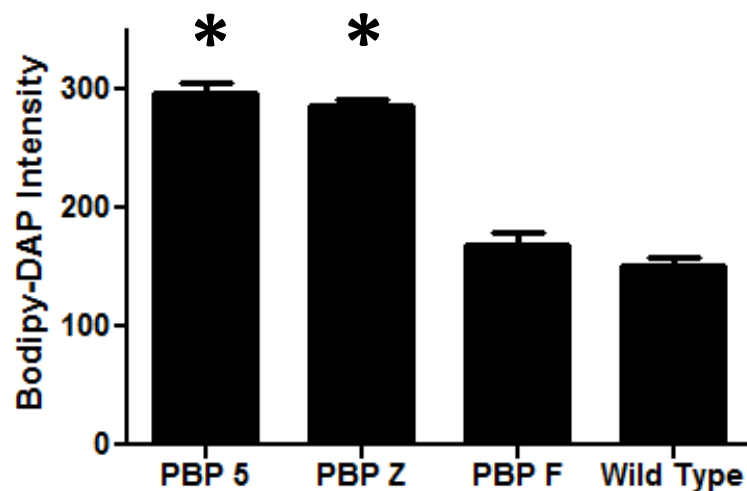

Figure S2. Bodipy-labeled daptomycin binding of *E. faecium* and  $\Delta$ pbp5,  $\Delta$ pbpF,  $\Delta$ pbpZ knockouts. Representative microscopic imaging are shown above and quantitation of binding shown below.  $\Delta$ pbp5,  $\Delta$ pbpZ mutants showed increased binding compared to the parental strain ( $p < 0.05$ , t-test).
